# Supplementary material
Source: publisher site journal article supplement (http://oneecosystem.pensoft.net/article/download/suppl/3566854/)
Supplement: Supplementary file 1

**Table S2. Correspondence between our classification and labels for marine and coastal CES as found in the literature.**

| **Marine and coastal CES** | **Labels found in the literature review** |
| --- | --- |
| **Recreation and leisure** | Recreation; going for walks; recreation and leisure; childhood play and discovery; tourism; recreational fishing; boating; diving; leisure and recreation; recreation and ecotourism; deer hunting; park visitation; recreational opportunities; whale watching; beach going; recreational harvesting of shellfish; coral reef tourism; educational walks; tourism and recreation; leisure options; nature tourism and recreation; recreational hunting; nature appreciation; summer cottages; bathing; gathering seafood by hand; spearfishing; sailing; kayaking. |
| **Aesthetic** | Scene-scape; aerial views; sensory simulation; landscape aesthetics; aesthetic seascape values; aesthetic enjoyment; aesthetic values; aesthetic benefits; aesthetic information; aesthetic appreciation; natural beauty; aesthetic; aesthetic enjoyment; scenic value; scenery provisioning. |
| **Cultural heritage and identity** | Informal local traditions; identity; historic; historic heritage; cultural heritage; cultural identity; ice as part of cultural landscape; cultural heritage values; place/heritage; local identity; heritage/indigenous services; cultural diversity; cultural heritage and identity; cultural nurturing. |
| **Spiritual, sacred and/or religious** | Spiritual appreciation; cultural-religious festivals; spiritual services; mythological representation; ritual representation; spiritual; spiritual and religious; spiritual benefits; spiritual fulfilment; religious value; ice as part of spiritual landscape; culture; ceremonial sites; religious ceremonies; sacred places; spirituality; spiritual experience; religious values; spiritual, sacred and/or religious; religious usage; spiritual and uplifting experiences; |
| **Educational** | Education; educational walks; educational source; educational values; educational; environmental education. |
| **Inspiration for culture, art and design** | Photography; landscape painting; literature; songs; film locations; inspiration; scientific inspiration; inspiration of art, folklore, and architecture; inspiration for art and design; artistic inspiration; inspiration for traditional songs and dances; inspiration for culture, art and design; traditional products and handcraft; inspirational value; inspiration and creation. |
| **Sense of place** | Sense of place; emotional affiliation to the site; home; place/heritage; sense of belonging to and connection with the coastline. |
| **Social relations** | Place-rooted livelihoods; social capital; socio-political representation; social relations and politics; sense of community; stewardship activities; social cohesion; community celebrations and festivals; societal; social relations. |
| **Scientific** | Ecological studies; geological studies; historical studies; anthropological studies; sociological studies; scientific research; science; scientific inspiration; scientific; scientific study site; scientific knowledge. |
| **Existence** | Existence value; the legacy of nature; existence. |
| **Intellectual and representative interactions (group)** | Cognitive values; subsistence skills wisdom; traditional local knowledge; knowledge systems (traditional and formal); local ecological knowledge; local knowledge; source of knowledge; source of sensibility, awareness, and ethics. |
